# Supplementary material for: A Possible Modulator of Vitiligo Metabolic Impairment: Rethinking a PPARγ Agonist
Source: MDPI journal article supplement (doi:10.3390/cells11223583), 2022-11-12
Supplement: s1 [file s1]

**Supplementary Table S1. Primers for Real Time Quantitative Polymerase Chain Reaction**

| Target Gene | Foward Primer                   | Reverse primer                |
|-------------|---------------------------------|-------------------------------|
| βactin      | 5'-GACAGGATGCAGAAGGAGATTACT-3'  | 5'-TGATCCACATCTGCTGGAAGGT-3'  |
| ACADM       | 5'-TGGTGAATATCCAGTCCCCCT-3'     | 5'-CCAAGTCCAAGACCTCCACA -3'   |
| ACADS       | 5'-CCTCAGCGAACCAGGGAAC-3'       | 5'-TTCAGAACCCTAGAGTCGCC-3'    |
| ACOX        | 5'-CGCCGAGAGATCGAGAACAT-3'      | 5'-GACAGCCACCTCATAACGCT-3'    |
| Catalase    | 5'-GGGCAACAGGCAGATTTG-3'        | 5'-CTGCTCCTTCCAGTGCTG-3'      |
| CD36        | 5'-CGGCTGCAGGTCAACCTATT -3'     | 5'-GGTCCCAGTCTCATTAAAGCCA-3'  |
| Cox2        | 5'-GAATCATTCACCAGGCAAATTC-3'    | 5'-CTGTACTGCGGGTGGAACATT-3'   |
| CXCR3B      | 5'-TGCCAGGCCTTTACACAGC -3'      | 5'-TCGGCGTCATTTAGCACTTG-3'    |
| Glut1       | 5'-TGGCATCAACGCTGTCTTCT-3'      | 5'-AGCCAATGGTGGCATACACA3'     |
| Glut3       | 5'-CGAACTTCCTAGTCGGATTG-3'      | 5'-AGGAGGCACGACTTAGACAT-3'    |
| Glut4       | 5'-TCAGAGACTCCAGGATCGGTT -3'    | 5'-GGTTCCCCATCTTCGGAGC-3'     |
| Hexo2       | 5'-CCTCGGTTTCCCAACTCTGC -3'     | 5'-GGTCAACCTTCTGCACTTGG-3'    |
| HMGB1       | 5'-GTGCCTCGCTGAGGAAAAAT-3'      | 5'-TCCTCCCGACAAGTTTGAC-3'     |
| HO-1        | 5'-CAGTGCCACCAAGTTCAAG-3'       | 5'-CAAGACTGCGTTCTCTGCT-3'     |
| IGFBP3      | 5'-CACTCTGGGAACCTATAAG-3'       | 5'-ATTACTTGTGATGCCTCTG -3'    |
| IGFBP5      | 5'-CGGGGTTTGCCTCAACGAA-3'       | 5'-TCTTGGGGGAGTAGGTCTCCT-3'   |
| IGFBP7      | 5'-GCTGTGAGGTCATCGGAATC-3'      | 5'-ACCAGGCAGGAGTTCTGTC-3'     |
| MICA        | 5'-GTCCTGAGGAGAACAGTGCC -3'     | 5'-GGGATAGAAGCCAGAAGCCC-3'    |
| MICB        | 5'-GAGAAGGTGGCGACGTAGG-3'       | 5- GACTGTGGGGCTCAGCG -3'      |
| MITF        | 5'-ATGGACGACACCCTTTCTC-3'       | 5'-GGAGGATTGCGTAACAAGTG-3'    |
| OGDH        | 5'-CCCTGGGGATTTTGGATGCT-3'      | 5'-CCAGGCCATAGAACCCAAGT-3'    |
| PC          | 5'-TTGCCTCCGCAGATAGTGTC-3'      | 5'-GGATTCCCAGGAGCCTCAG-3'     |
| PD-L1       | 5'-TGCAGGGCATTCCAGAAAGA-3'      | 5'-ACCGTGACAGTAAATGCGTTC-3'   |
| PDK4        | 5'-CCCTGAGAATTATTGACCGCCT-3'    | 5'-CCGTAACCAAAACCAGCCAAA-3'   |
| PGC1α       | 5'-TCATTCAGGAGCTGGATGGC-3'      | 5"GAGCAGCACACTCGATGTCA-3'J    |
| PKM1,2      | 5'-TCAGCGCCGGAGGACC-3'          | 5'-TGCTCCAGGAATGTGTCAGC-3'    |
| p16         | 5'-GAGCAGCATGGAGCCTTC-3'        | 5'-CATCATCATGACCTGGAT-3'      |
| p21         | 5'-CGCTCTTACATCTTCTGCCTTAGTC-3' | 5'-AACCTCTCATTCAACCGCCCTAG-3' |
| SOD2        | 5'-GGCTGCATCTGTTGGTGTCC-3'      | 5'-TCCCACACATCAATCCCCAG-3'    |
| UCP2        | 5'-AGTCCGGTTACAGATCCAAGG -3'    | 5'-TCAGAATGGTGCCCATCACA-3'    |
| VDAC        | 5'-CCCGGAAGGCAGAAGATGG-3'       | 5'-TTGGTGAAGACATCCCTGGC-3'    |

Supplementary Table S2. Primary Antibodies

| Antibody     | Diluition |                       |
|--------------|-----------|-----------------------|
| βactin       | 1:10000   | SIGMA-Aldrich         |
| AMPK         | 1:1000    | CellSignaling         |
| p-AMPK       | 1:1000    | CellSignaling         |
| b- FGF       | 1:1000    | Upstate Biotechnology |
| CD36         | 1:1000    | CellSignaling         |
| Erk          | 1:1000    | SantaCruz             |
| p- Erk       | 1:1000    | CellSignaling         |
| Fibronectin  | 1:500     | SantaCruz             |
| Hexo2        | 1:1000    | CellSignaling         |
| HGF          | 1:1000    | CellSignaling         |
| Hsp70        | 1:1000    | CellSignaling         |
| IGFBP3       | 1:1000    | CellSignaling         |
| MITF         | 1:1000    | CellSignaling         |
| m TOR        | 1:1000    | CellSignaling         |
| p m TOR      | 1:1000    | CellSignaling         |
| Total OXPHOS | 1:1000    | Abcam                 |
| PDK4         | 1:1000    | CellSignaling         |
| PKM1,2       | 1:1000    | CellSignaling         |
| UCP2         | 1:1000    | CellSignaling         |
